# Supplementary material for: A secreted MMP is required for reepithelialization during wound healing
Source: PubMed Central journal article supplement — Mol Biol Cell. 2012 Mar 15;23(6):1068–79. doi: 10.1091/mbc.E11-09-0745 (PMC3302734; doi:10.1091/mbc.e11-09-0745), 2012-03-15
Supplement: supp_E11-09-0745_CombinedSupMats.pdf [file supp_E11-09-0745_CombinedSupMats.pdf]

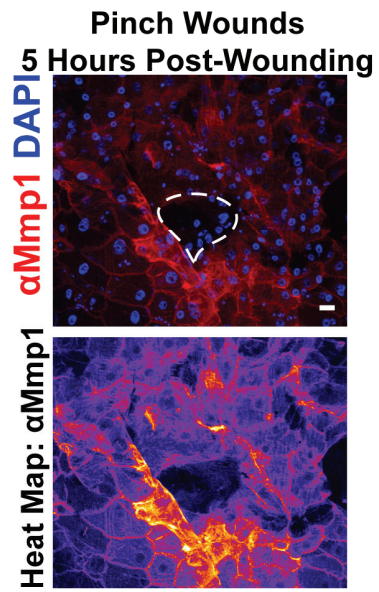

**Figure S1: Mmp1 is upregulated in pinch wounds.** Mmp1 up-regulation in pinch wounds 5h post-wounding, in a gradient radiating from the leading edge. Top: Mmp1 shown in red. Bottom: Mmp1 shown as a heat map. The white dashed lines (top) outline the wound bed. Scale bar (top panel) represents 20 $\mu$ m.

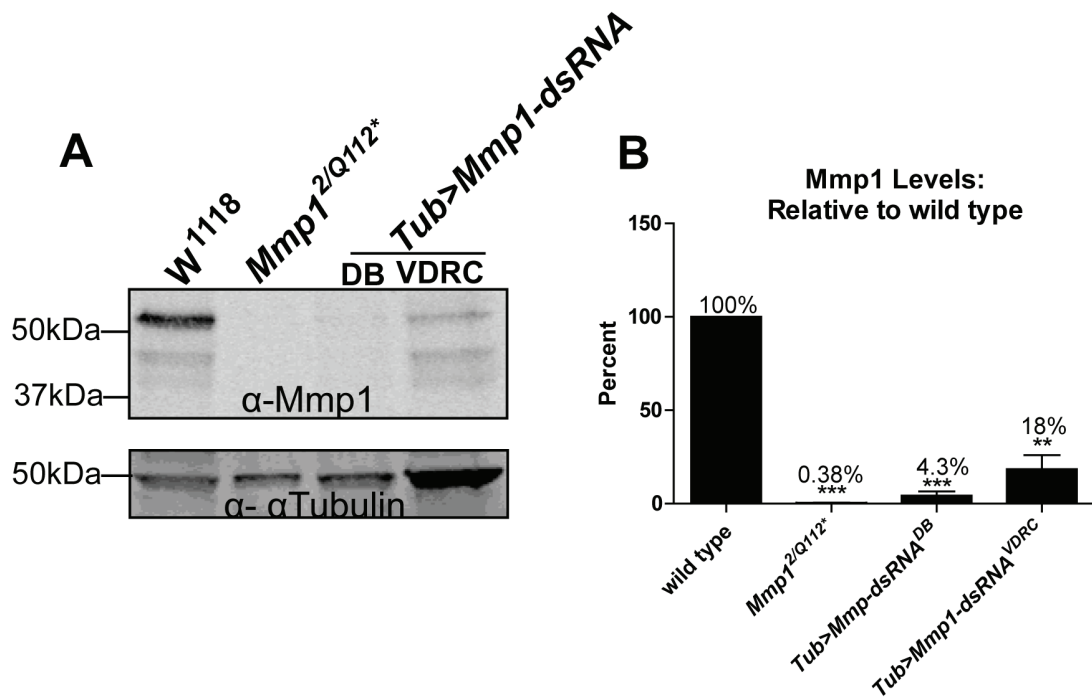

**Figure S2: Mmp1-dsRNA knock-down efficiency.**

**A)** Western blot comparing RNA-interference mediated knock-down of Mmp1 from two different constructs. An *Mmp1* null line (2/Q112\*) demonstrates the specificity of the antibody. DB indicates the *UAS-Mmp1-dsRNA* line from D. Bohmann (Uhlirova, M, & Bohmann, D., 2006) and VDRC indicates the *UAS-Mmp1-dsRNA* line from Vienna RNAi Stock Center. Lysates were made from whole 3rd instar larvae (see Materials and Methods). Anti- $\alpha$ Tubulin was used as a loading control. **B)** Quantification of western blots showing the mean level of Mmp1 expression compared to wild-type of *Mmp1* null mutants (0.38%,  $p < 0.0001$ ), *Tub>Mmp1-dsRNA*<sup>DB</sup> (4.3%,  $p = 0.0006$ ), and *Tub>Mmp1-DsRNA*<sup>VDRC</sup> (18%,  $p = 0.0082$ ). Error bars represent standard error of the mean for 3 independent replicates, p-values calculated by Student's t-test comparing each genotype to wild-type.

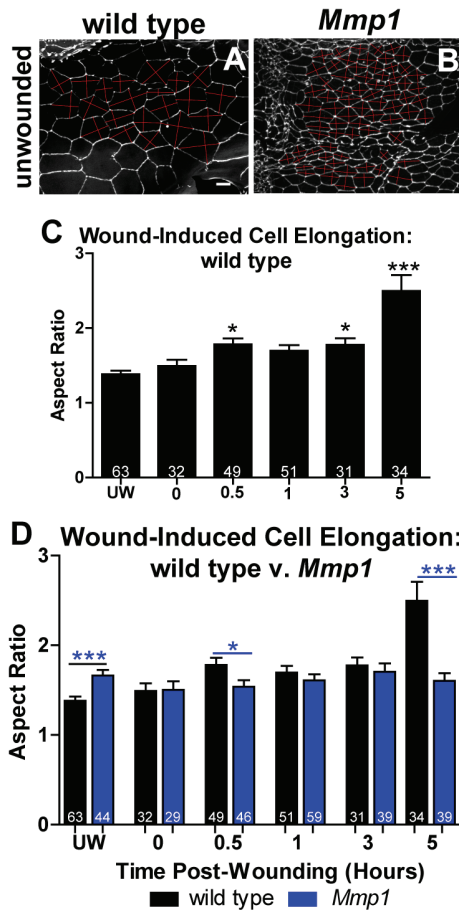

**Figure S3: Wound-induced cell elongation changes.**

**A-B)** Representative images of unwounded epidermis in wild type (A) and *Mmp1* mutants (B) with perpendicular red lines highlighting axes measured for aspect ratio calculations. Scale bar (A) represents 20 $\mu$ m. **C)** Quantification of wild-type wound-induced cell aspect-ratio changes over time in leading edge cells. Aspect ratios at each time point were compared to that at 0h post-wounding. Aspect ratios showed modest changes (with significant differences at 0.5h,  $p=0.017$ , and 3h,  $p=0.023$ ) until 5h when ratios showed clear elongation that was highly significantly different from 0h ( $p<0.0001$ ). **D)** Bar graph comparing aspect ratios between wild type and *Mmp1* mutants showing that *Mmp1* mutant cells are significantly different from wild-type in unwounded epidermis ( $p=0.0004$ ), as well as at 0.5h ( $p=0.030$ ) and 5h ( $p=0.0001$ ) post-wounding. There is no significant difference between wild-type and *Mmp1* mutant cell elongation at 0h, 1h, and 3h post-wounding. Numbers on bars designate the number of cells measured within each genotype. Error bars represent the standard error of the mean (C-D).

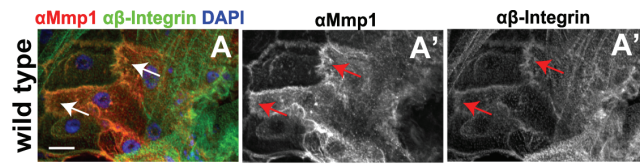

**Figure S4: Mmp1 co-localizes with  $\beta$ -integrin post-wounding.**  
**A-A'')** Antibody staining against Mmp1 (A') and against  $\beta$ -integrin (A'') showing co-localization (A) at the distal tips of leading edge cells 5h post-wounding, as indicated by arrows ( $n \geq 15$ ). Scale bar in A represents  $20\mu\text{m}$ .

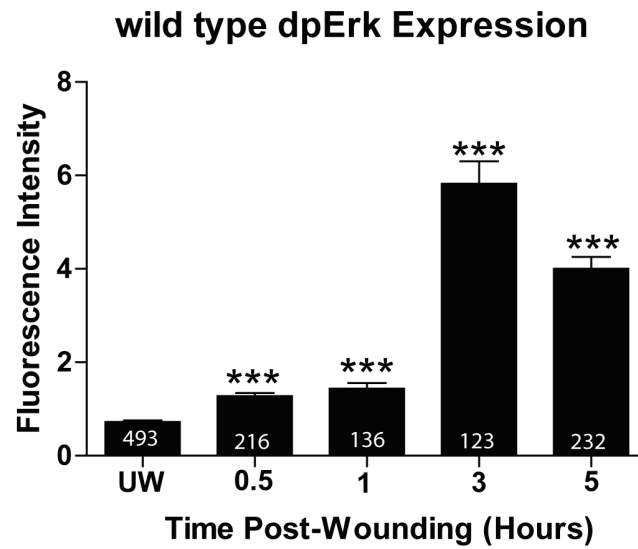

**Figure S5: Wound-induced changes in wild-type dpErk intensity.** Quantification of wound-induced dpErk expression at the leading edge over time in wild-type animals (see Materials and Methods). dpErk is significantly up-regulated, relative to unwounded expression, in all time points tested ( $p < 0.0001$  at each time point by Student's t-test). Error bars represent standard error of the mean.
